# Supplementary material for: Synthesis of α-hydroxy ketones and vicinal (R,R)-diols by Bacillus clausii DSM 8716T butanediol dehydrogenase
Source: Royal Society of Chemistry journal article supplement (doi:10.1039/d0ra02066d), 2020-01-01
Supplement: d0ra02066d1.pdf [file d0ra02066d1.pdf]

## Electronic Supplementary Information

### Synthesis of $\alpha$ -hydroxy ketones and vicinal (*R,R*)-diols by *Bacillus clausii*

#### DSM 8716<sup>T</sup> butanediol dehydrogenase

Lukas Muschallik<sup>a</sup>, Denise Molinnus<sup>a</sup>, Melanie Jablonski<sup>a</sup>, Carina Ronja Kipp<sup>a</sup>, Johannes Bongaerts<sup>a</sup>,  
Martina Pohl<sup>b</sup>, Torsten Wagner<sup>a</sup>, Michael J. Schöning<sup>a</sup>, Thorsten Selmer<sup>a</sup>, Petra Siegert<sup>\*a</sup>

<sup>a</sup> *Institute of Nano- and Biotechnologies, Aachen University of Applied Sciences, 52428 Jülich, Germany*

<sup>b</sup> *IBG-1: Biotechnology, Forschungszentrum Jülich, 52425 Jülich, Germany*

\*Corresponding author at: Heinrich-Mussmannstr. 1, 52428 Jülich, Germany. *E-mail address:* siegert@fh-aachen.de

#### Table of contents

1. GC-MS spectra
2. GC-Chromatograms
3. NMR-spectrum

# 1 GC-MS spectra

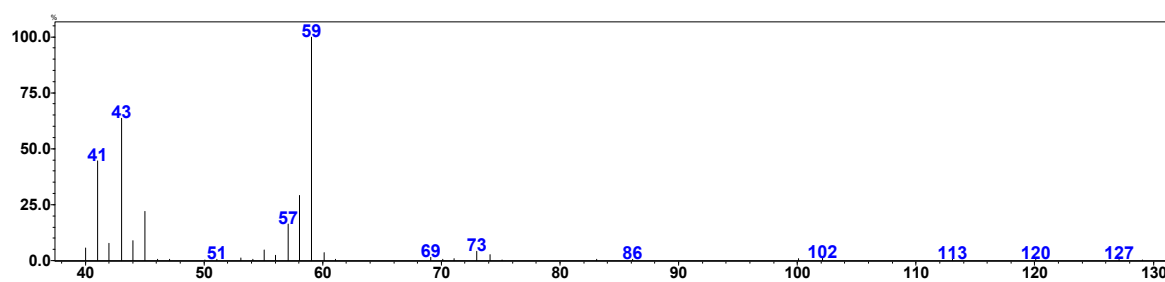

Supplementary Figure 1: Mass spectrum of 3-hydroxy-2-pentanone. Retention time: 16.4 min.

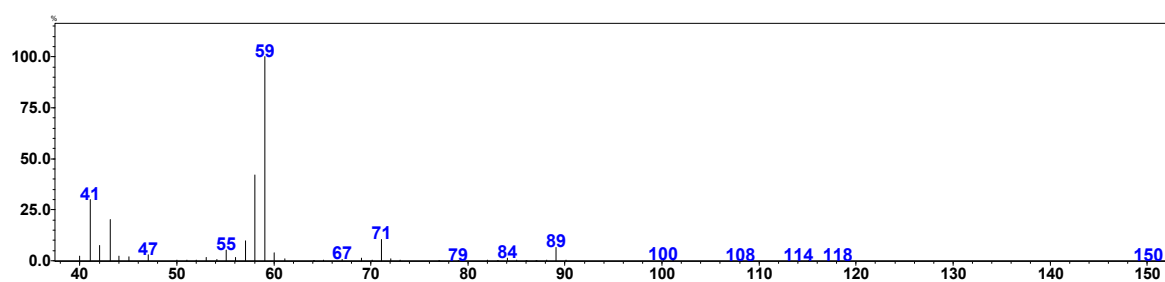

Supplementary Figure 2: Mass spectrum of (R)-3,4-hexanediol. Retention time: 21.0 min.

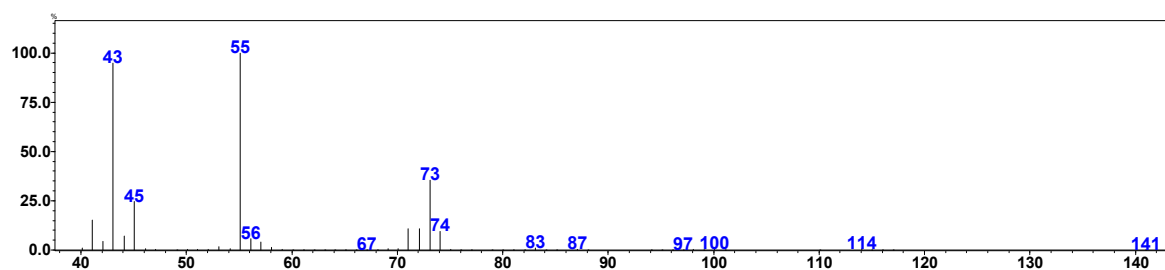

Supplementary Figure 3: Mass spectrum of (R)-3-hydroxy-2-hexanone. Retention time: 19.3 min.

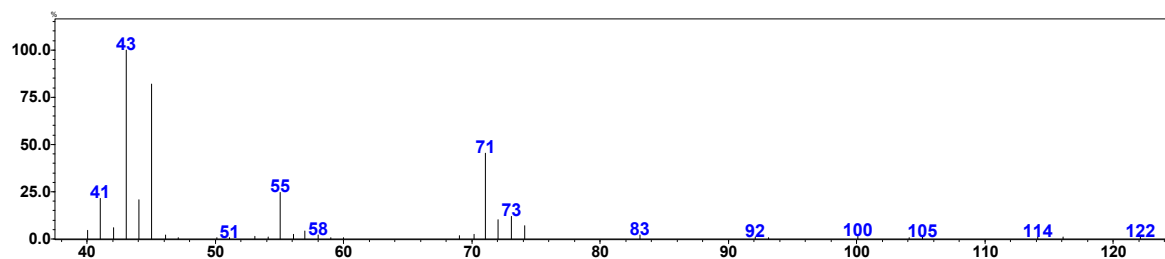

Supplementary Figure 4: Mass spectrum of (R)-2-hydroxy-3-hexanone. Retention time: 19.4 min.

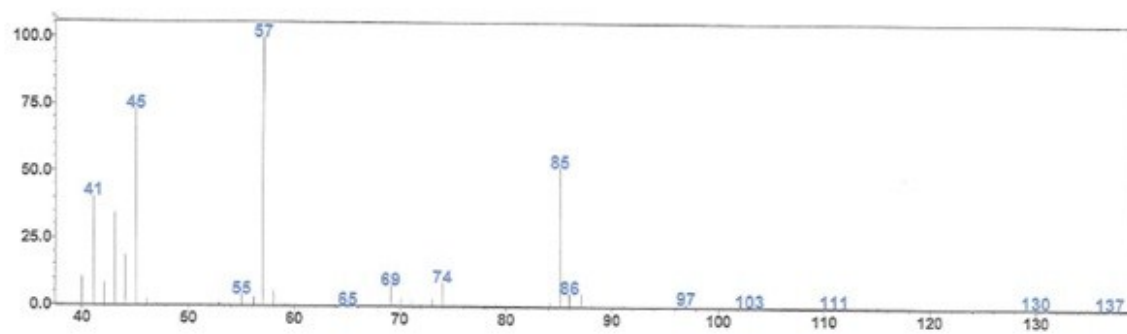

Supplementary Figure 5: Mass spectrum of (*R*)-2-hydroxy-3-hexanone. Retention time: 19.7 min.

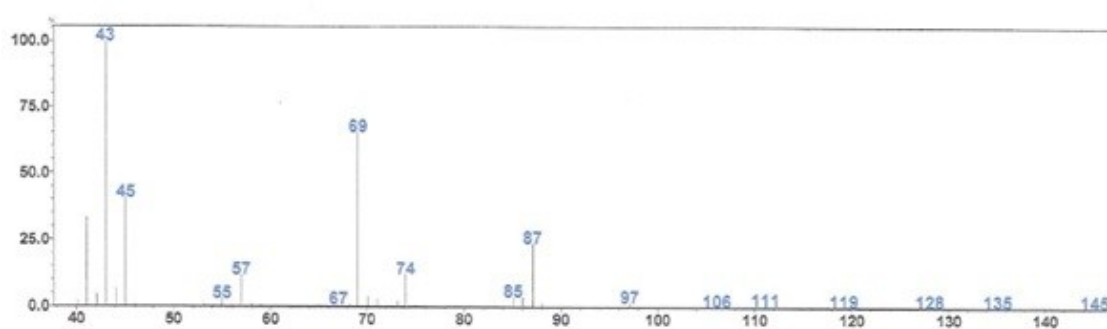

Supplementary Figure 6: Mass spectrum of (*R*)-2-hydroxy-3-hexanone. Retention time: 19.9 min.

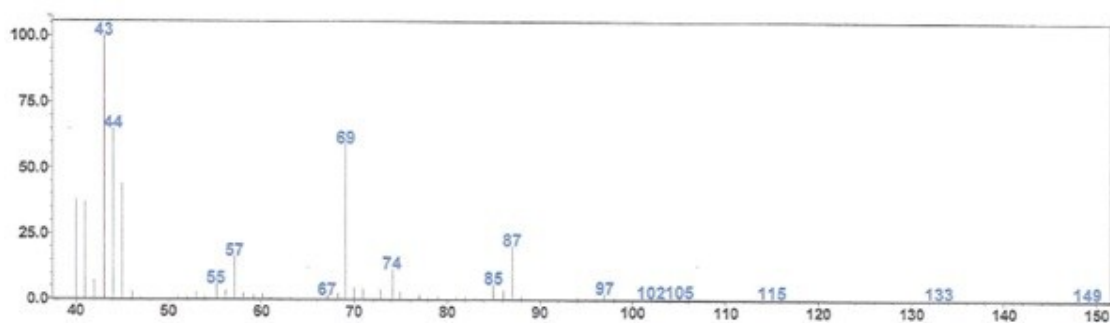

Supplementary Figure 7: Mass spectrum of (*S*)-3-hydroxy-2-hexanone. Retention time: 20.1 min.

## 2 GC-Chromatogramms

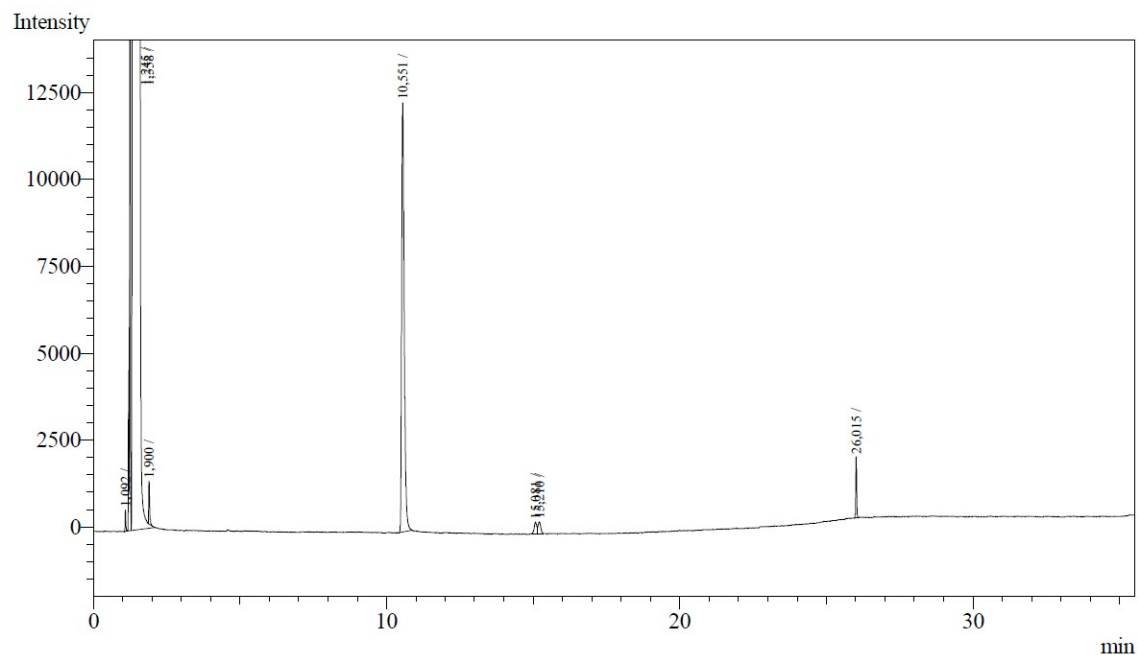

Supplementary Figure 8: Gas chromatogramm of the reduction of 3-hydroxy-3-methyl-2-butanone by BcIBDH. Substrate (10 mM each) was reduced by 1 U BDH using formate (30 mM) and formate dehydrogenase (5 U) to regenerate NADH (0.3 mM) at 30 °C in MES-NaOH buffer (50 mM, pH 6.8; 1 ml). Reaction time 0 min.

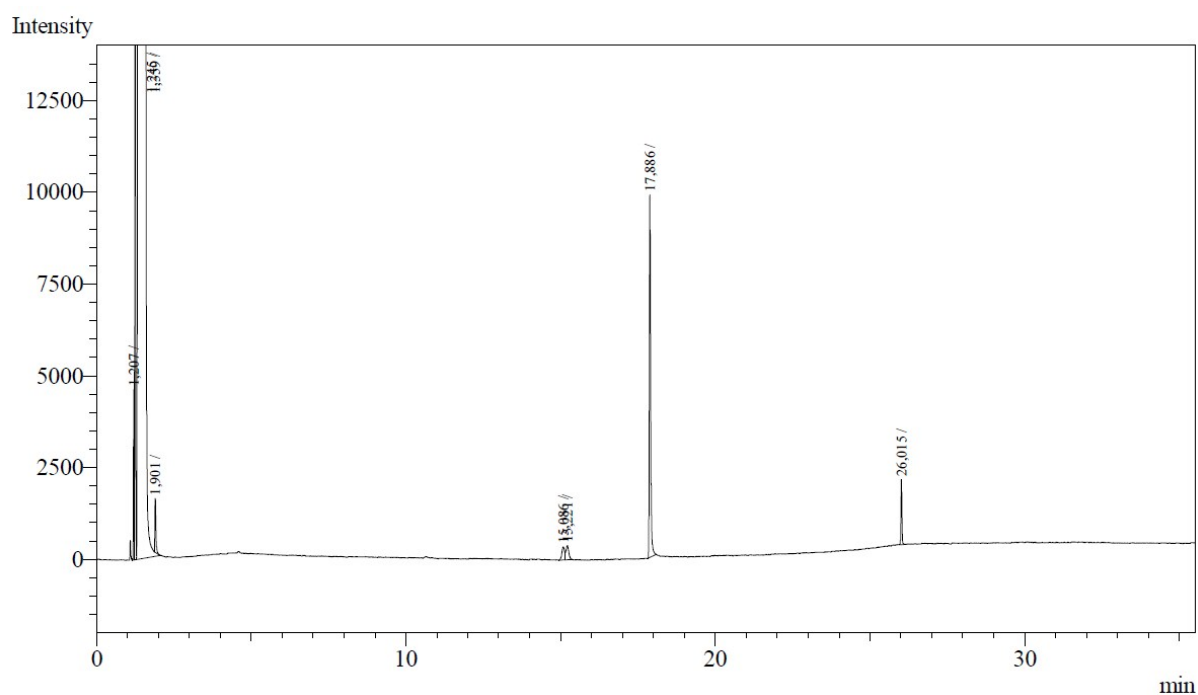

Supplementary Figure 9: Gas chromatogramm of the reduction of 3-hydroxy-3-methyl-2-butanone by BcBDH. Substrate (10 mM each) was reduced by 1 U BDH using formate (30 mM) and formate dehydrogenase (5 U) to regenerate NADH (0.3 mM) at 30 °C in MES-NaOH buffer (50 mM, pH 6.8; 1 ml). Reaction time 60 min.

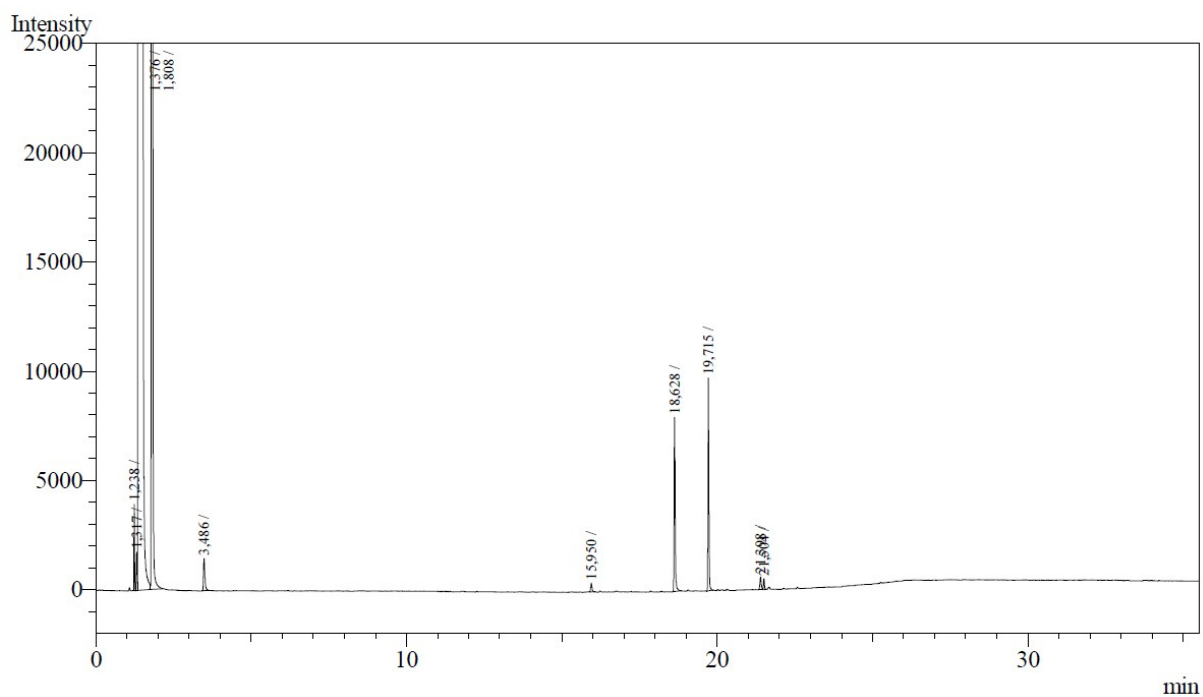

Supplementary Figure 10: Gas chromatogramm of the reduction of *Rac* 4-hydroxy-3-hexanone by BcBDH. Substrate (10 mM each) was reduced by 1 U BDH using formate (30 mM) and formate dehydrogenase (5 U) to regenerate NADH (0.3 mM) at 30 °C in MES-NaOH buffer (50 mM, pH 6.8; 1 ml). Reaction time 0 min.

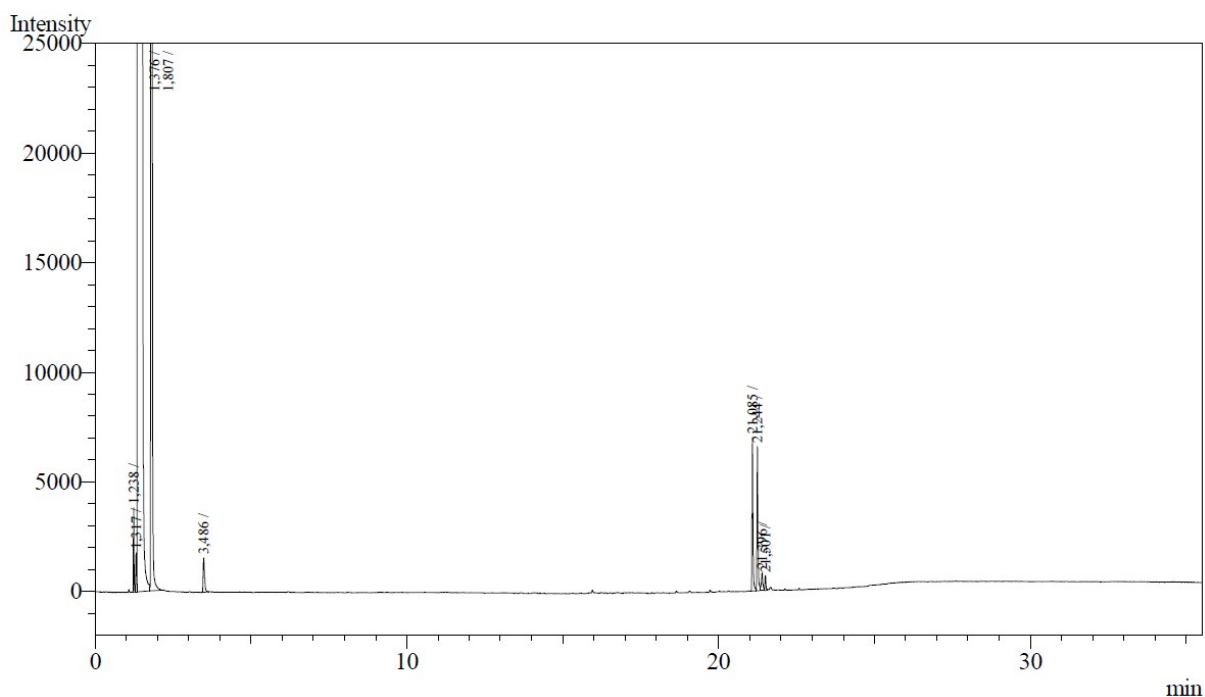

Supplementary Figure 11: Gas chromatogramm of the reduction of *Rac* 4-hydroxy-3-hexanone by BcBDH. Substrate (10 mM each) was reduced by 1 U BDH using formate (30 mM) and formate dehydrogenase (5 U) to regenerate NADH (0.3 mM) at 30 °C in MES-NaOH buffer (50 mM, pH 6.8; 1 ml). Reaction time 60 min.

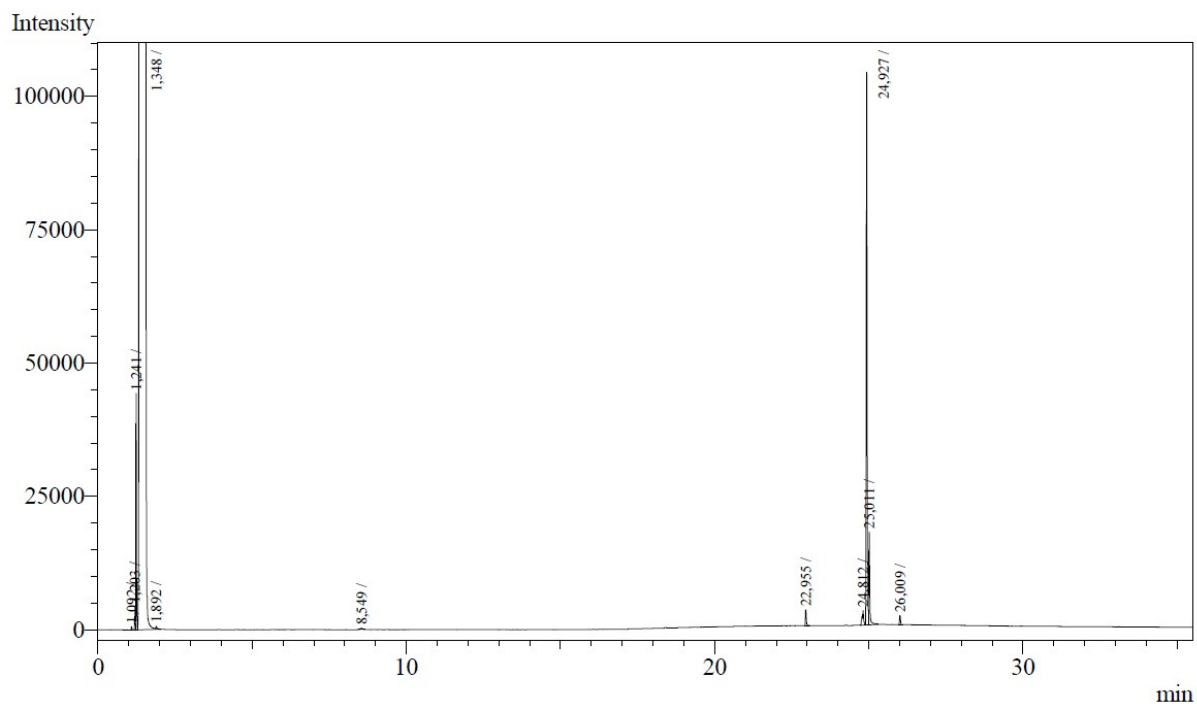

Supplementary Figure 12: Gas chromatogram of the reduction of (S)-HPP by BcBDH. Substrate (10 mM each) was reduced by 1 U BDH using formate (30 mM) and formate dehydrogenase (5 U) to regenerate NADH (0.3 mM) at 30 °C in MES-NaOH buffer (50 mM, pH 6.8; 1 ml). Reaction time 0 min.

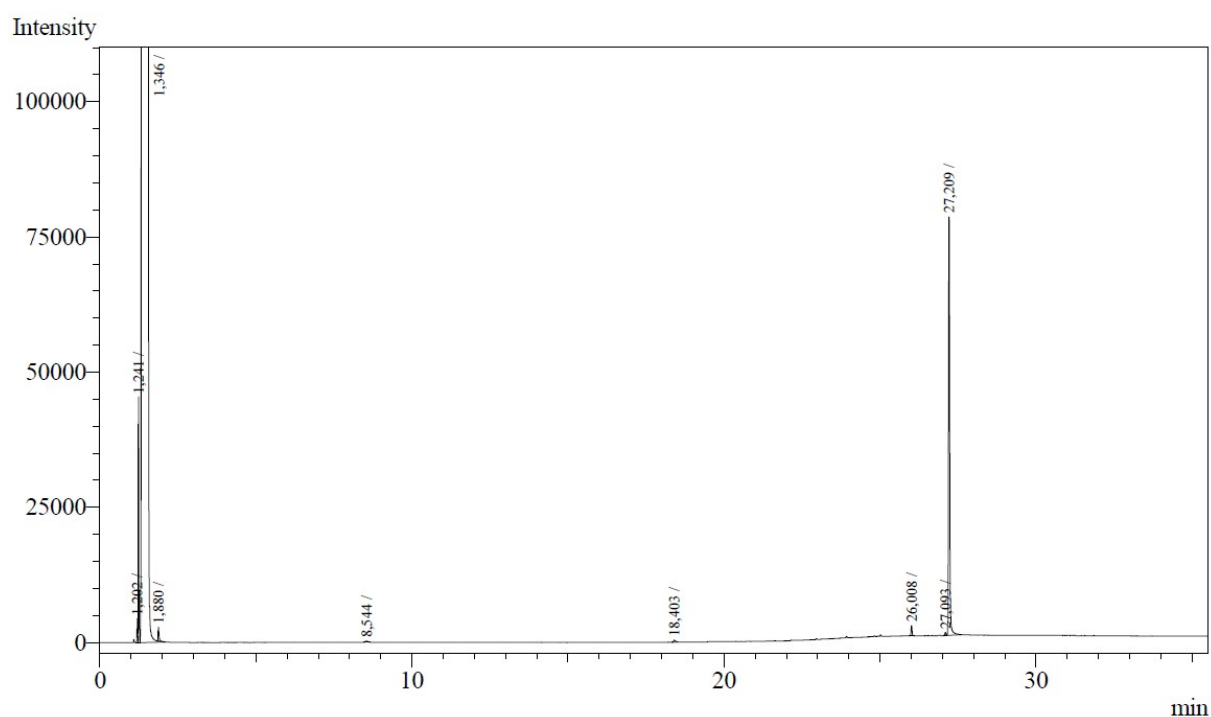

Supplementary Figure 13: Gas chromatogram of the reduction of (S)-HPP by BcBDH. Substrate (10 mM each) was reduced by 1 U BDH using formate (30 mM) and formate dehydrogenase (5 U) to regenerate NADH (0.3 mM) at 30 °C in MES-NaOH buffer (50 mM, pH 6.8; 1 ml). Reaction time 60 min.

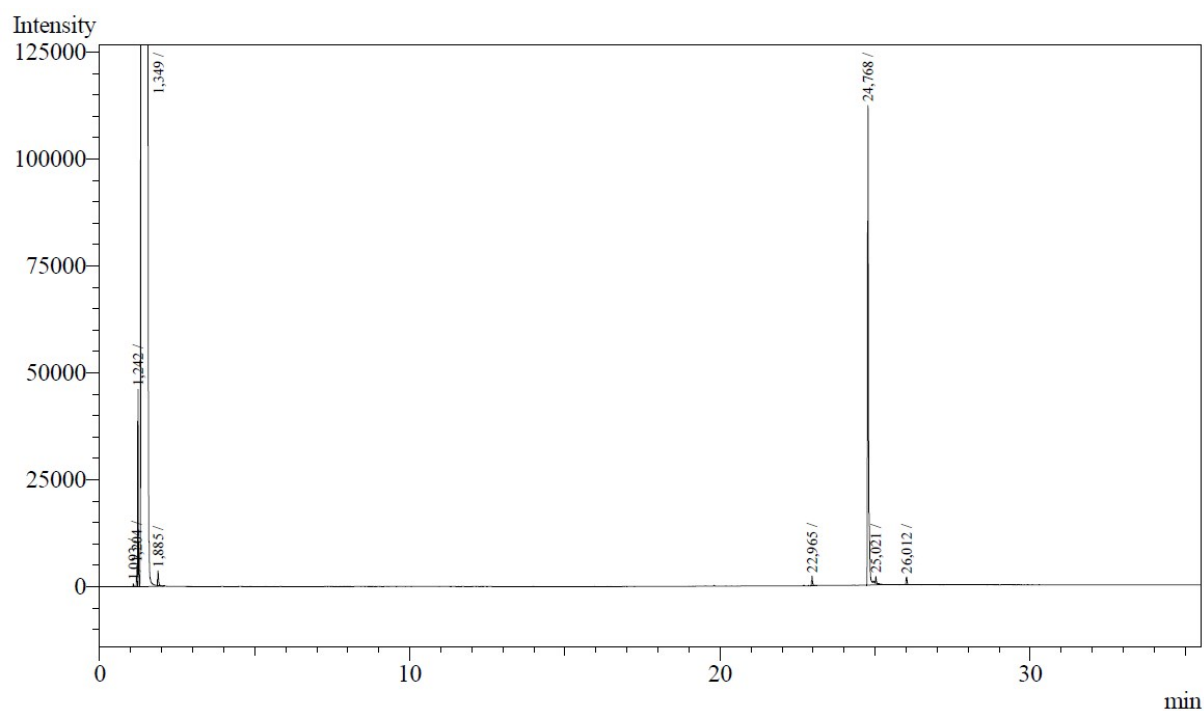

Supplementary Figure 14: Gas chromatogram of the reduction of (*R*)-HPP by BcBDH. Substrate (10 mM each) was reduced by 1 U BDH using formate (30 mM) and formate dehydrogenase (5 U) to regenerate NADH (0.3 mM) at 30 °C in MES-NaOH buffer (50 mM, pH 6.8; 1 ml). Reaction time 0 min.

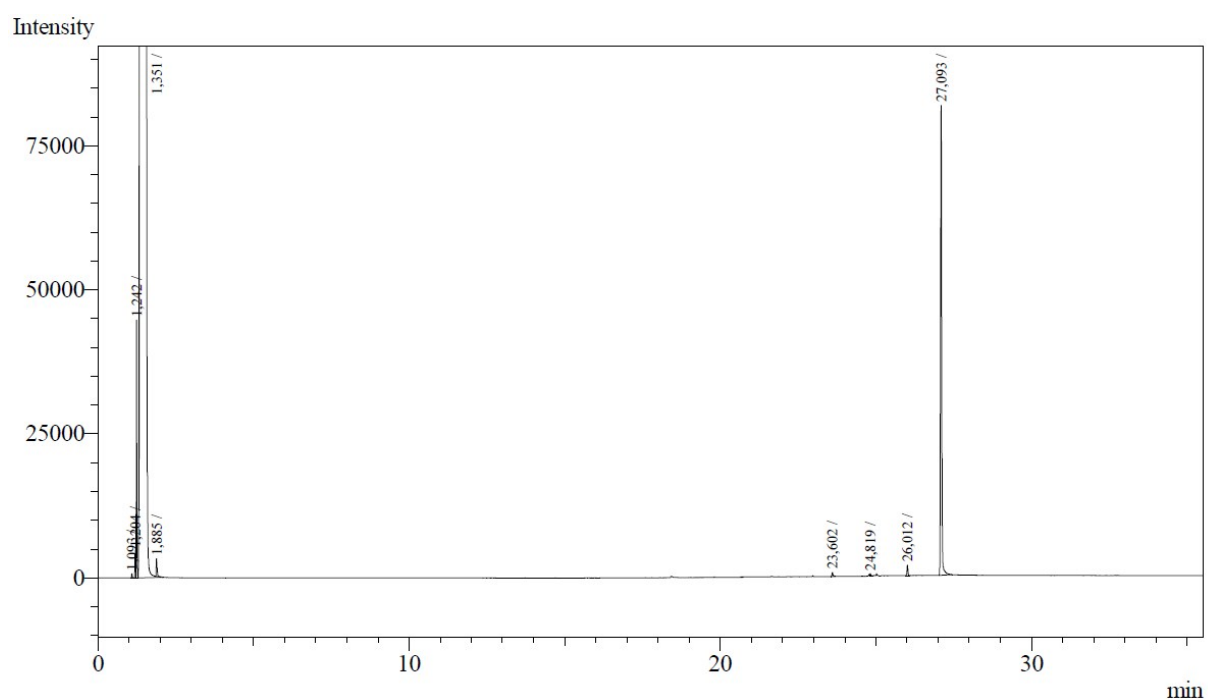

Supplementary Figure 15: Gas chromatogram of the reduction of (*R*)-HPP by BcBDH. Substrate (10 mM each) was reduced by 1 U BDH using formate (30 mM) and formate dehydrogenase (5 U) to regenerate NADH (0.3 mM) at 30 °C in MES-NaOH buffer (50 mM, pH 6.8; 1 ml). Reaction time 60 min.

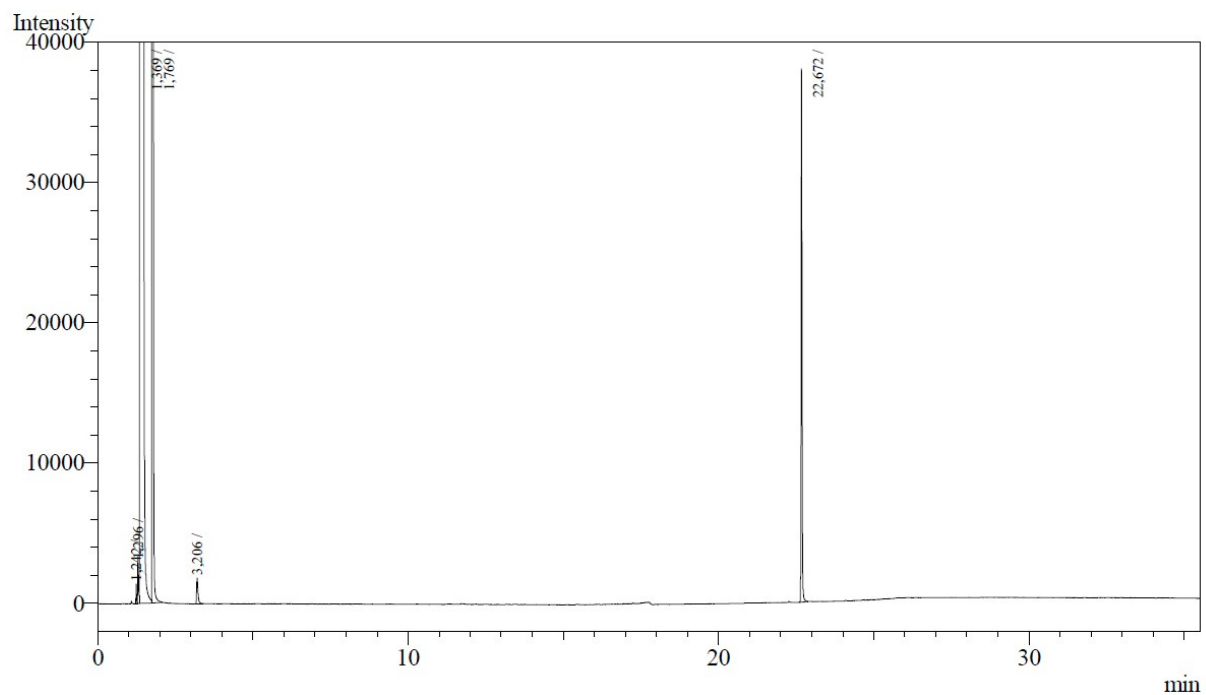

Supplementary Figure 16: Gas chromatogramm of the reduction of 1-phenyl-1,2-propanedione by BcBDH. Substrate (10 mM each) was reduced by 1 U BDH using formate (30 mM) and formate dehydrogenase (5 U) to regenerate NADH (0.3 mM) at 30 °C in MES-NaOH buffer (50 mM, pH 6.8; 1 ml). Reaction time 0 min.

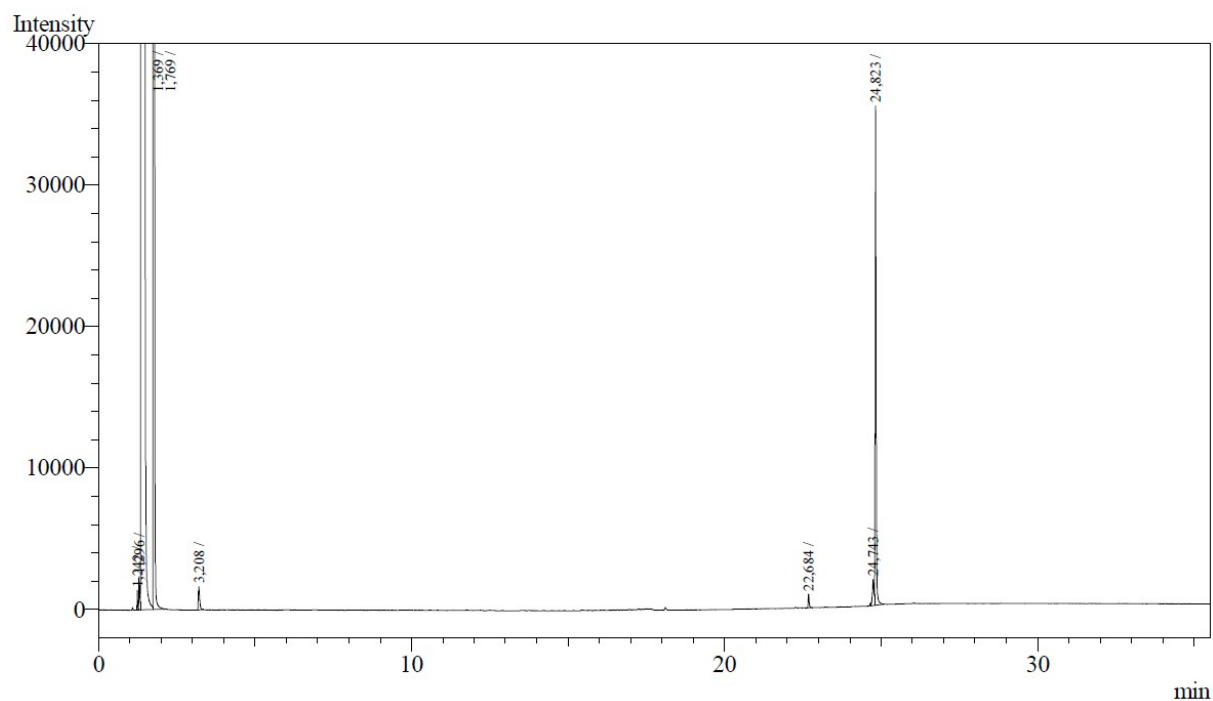

Supplementary Figure 17: Gas chromatogramm of the reduction of 1-phenyl-1,2-propanedione by BcBDH. Substrate (10 mM each) was reduced by 1 U BDH using formate (30 mM) and formate dehydrogenase (5 U) to regenerate NADH (0.3 mM) at 30 °C in MES-NaOH buffer (50 mM, pH 6.8; 1 ml). Reaction time 60 min.



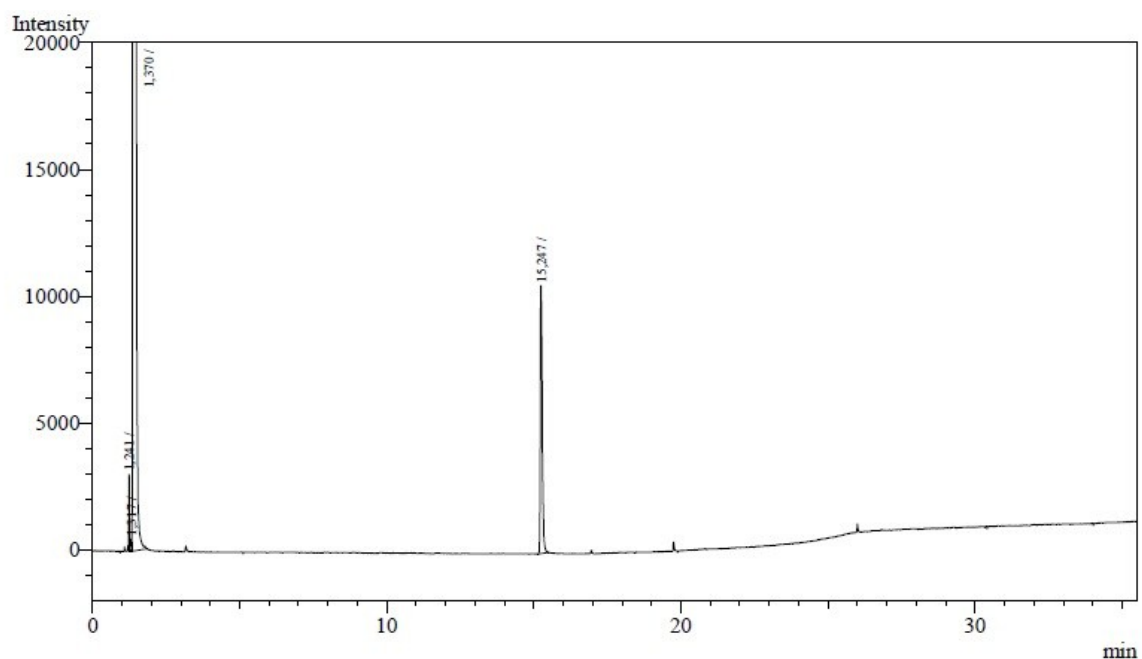

Supplementary Figure 18: Gas chromatogramm of the reduction of 2,3-heptanedione by BcBDH. Substrate (10 mM each) was reduced by 1 U BDH using formate (30 mM) and formate dehydrogenase (5 U) to regenerate NADH (0.3 mM) at 30 °C in MES-NaOH buffer (50 mM, pH 6.8; 1 ml). Reaction time 0 min.

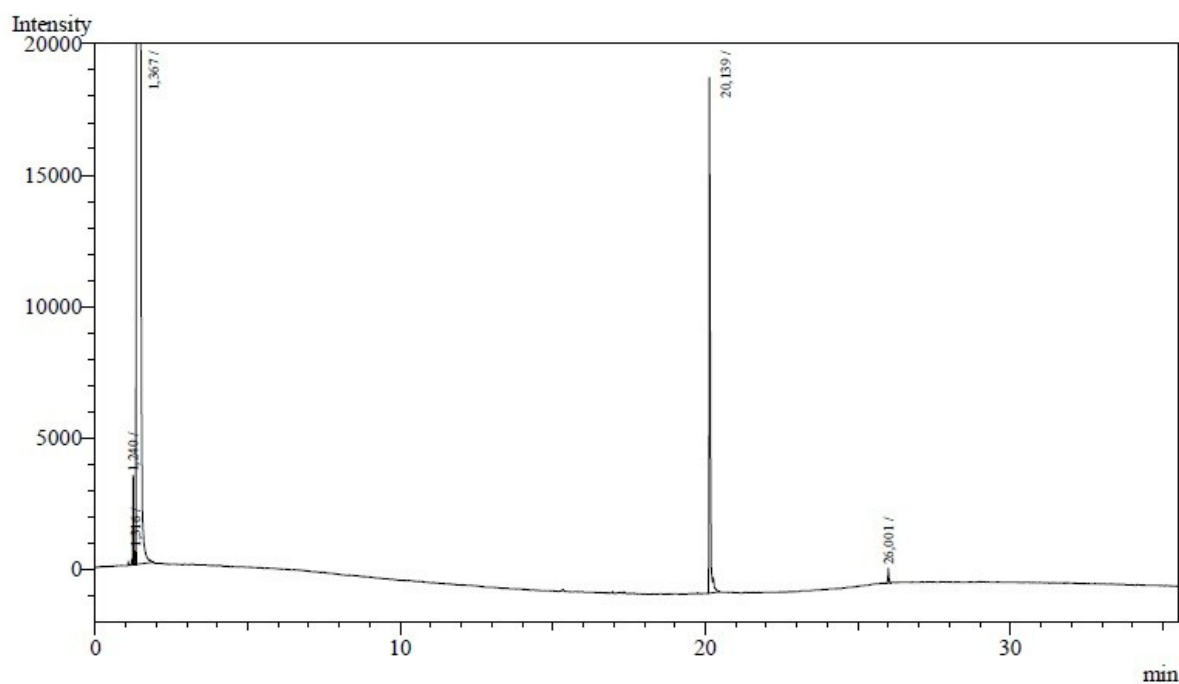

Supplementary Figure 19: Gas chromatogramm of the reduction of 2,3-heptanedione by BcBDH. Substrate (10 mM each) was reduced by 1 U BDH using formate (30 mM) and formate dehydrogenase (5 U) to regenerate NADH (0.3 mM) at 30 °C in MES-NaOH buffer (50 mM, pH 6.8; 1 ml). Reaction time 60 min.

### 3 NMR

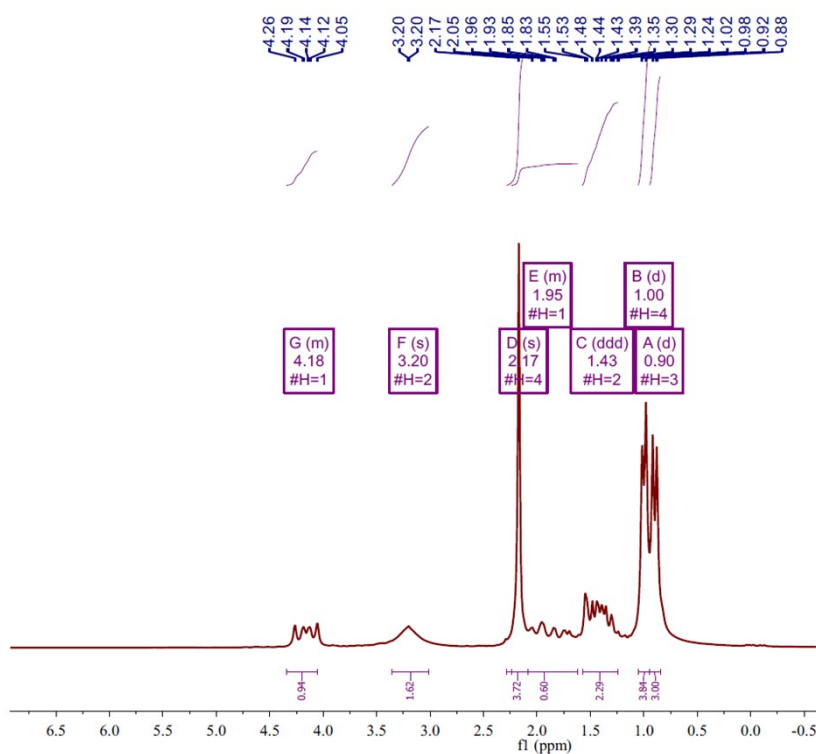

Supplementary Figure 20:  $^1\text{H}$ -NMR of biocatalytic product (*R*)-5-methyl-3-hydroxy-2-hexanone, containing small amounts of 5-methyl-2-hydroxy-3-hexanone. ( $\text{CDCl}_3$ )  $\sigma$  0.90 (d, 3H), 1.00 (d, 4H), 1.43 (ddd, 2H), 1.95 (m, 1H), 2.17 (s, 4H), 3.20 (s, 2H) 4.18 (m, 1H). s = singlet; d = doublet; ddd = doublet of doublet of doublet; m = multiplet.

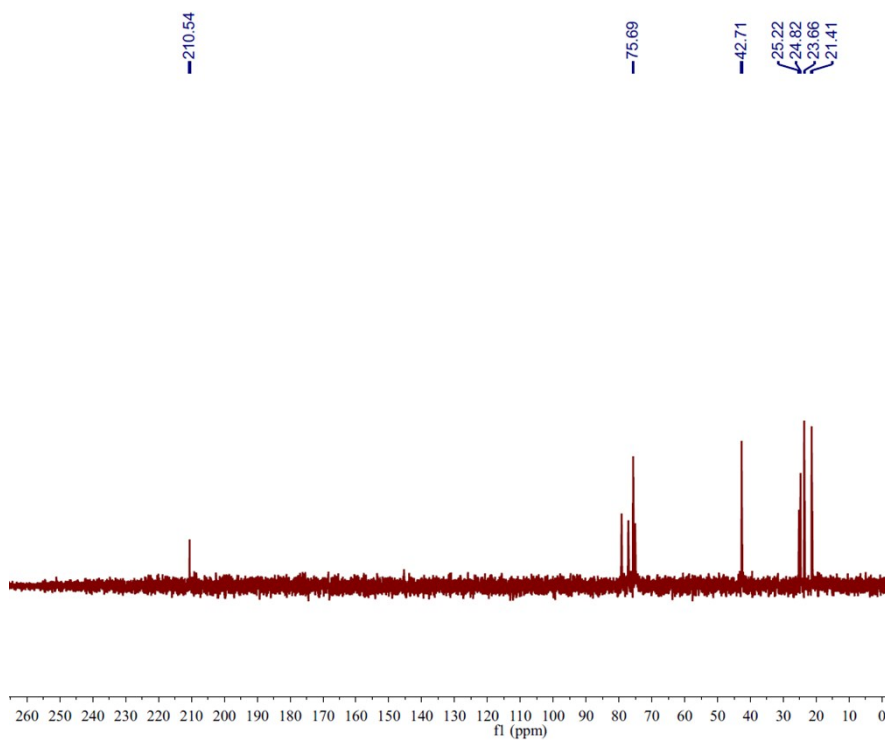

Supplementary Figure 21:  $^{13}\text{C}$ -NMR of biocatalytic product (*R*)-5-methyl-3-hydroxy-2-hexanone, containing small amounts of 5-methyl-2-hydroxy-3-hexanone. ( $\text{CDCl}_3$ )  $\sigma$  21.41; 23.66; 24.82; 25.22; 42.71; 75.69; 210.54.
